# Supplementary material
Source: ML conference proceedings conference paper supplement (https://openaccess.thecvf.com/content/cvpr_2016/html/Benitez-Quiroz_EmotioNet_An_Accurate_2016_CVPR_paper.html)
Supplement: Supplementary file 1 [file Benitez-Quiroz_EmotioNet_An_Accurate_2016_CVPR_supplemental.pdf]

# Supplementary Materials

## EmotioNet: An accurate, real-time algorithm for the automatic annotation of a million facial expressions in the wild

C. Fabian Benitez-Quiroz\*, Ramprakash Srinivasan\*, Aleix M. Martinez  
Dept. Electrical and Computer Engineering  
The Ohio State University

\*These authors contributed equally to this paper.

### 1. Extended Experimental Results

The within-database classification results on the shoulder database were compared to methods described in the literature which report results using ROC (Receiver Operating Characteristic) curves. ROC curves are used to visually and analytically evaluate the performance of binary classifiers. Recall that our classifiers are binary, i.e., AU present (active) in the image or not. ROC plots display the *true positive rate* against the *false positive rate*. The true positive rate is the sensitivity of the classifier, which we have previously defined as Recall in the main paper. The false positive rate is the number of negative test samples classified as positive (i.e., the image does not include AU  $i$  but is classified as having AU  $i$  present) over the total number of false positives plus true negatives. Note that the derived algorithm only provides a result, but this can be plotted in ROC space and compared to state-of-the-art methods. Furthermore, since we run a five-fold cross validation, we actually have five results plus the mean reported in the main document. Thus, we can plot six results in ROC space. These results are in Figure S1. Figure S2 provides the same ROC plots for the DISFA database.

As mentioned above, our proposed approach does not yield an ROC curve but rather a set of points in ROC space. We can nevertheless estimate an ROC curve by changing the value of the prior of each AU  $i$ . In the results reported in the main paper, we assumed equal priors for AU  $i$  active and not active. Reducing the prior of AU  $i$  active will decrease the false detection rate, i.e., it is less likely to misclassify a face that does not have AU  $i$  active as such. Increasing the prior of AU  $i$  active will increase the true positive detection rate. This is *not* what our algorithm does, but it is a simple extension of what can be obtained in applications where the use of priors is needed. Figures S3 and S4 provide the ROC curves thus computed on two of the databases used in the main paper, shoulder pain and DISFA.

The plots in Figures S3 allow us to compute the area un-

der the curve for the results of our algorithm on the shoulder pain database. These and comparative results against the algorithms of [5] and [11] are in Table S1. Once again, we see that the results obtained with the proposed algorithm are superior than those reported in the literature.

We also computed the results on a recent database of spontaneous facial expressions, AM-FED [7]. Our F1 scores where as follows: .93 (AU 2), .89 (AU 4), .94 (AU 5), .82 (AU 9), .92 (AU 12), .75 (AU 14), .82 (AU 15), .92 (AU 17), .90 (AU 18), .72 (AU 26).

### 2. EmotioNet: Facial Expressions of Emotion in the Wild

We collected one million images of facial expressions of emotion in the wild. Images were downloaded from several popular web search engines by using the emotive keywords defined as nodes of the word “feeling” in WordNet [8] and with the requirement that a face be present in the image. The number of concepts (i.e., words with the same meaning) given by WordNet was 421. These words are listed in Tables S2-S5.

This search yielded a large number of images. These images were further evaluated to guarantee they included a face. This was done in two stages. First, we used the face detector of [10] to detect faces in these images. Images where a face was not detected by this algorithm were discarded. Second, the resulting images were visually inspected by the authors. Images that did not have a face, had a drawing of a face or pornography were eliminated. The end result was a dataset of one million images. This set of images in the wild was the one used in the present work. The number of images in these categories varies from a low of 47 to a maximum of 6,300, and more than 1,000 categories have > 1,000 images. The average number of sample images/category is 600 (805 stdv).

As described in the main paper, images were automatically annotated by our algorithm. First, our algorithm anno-

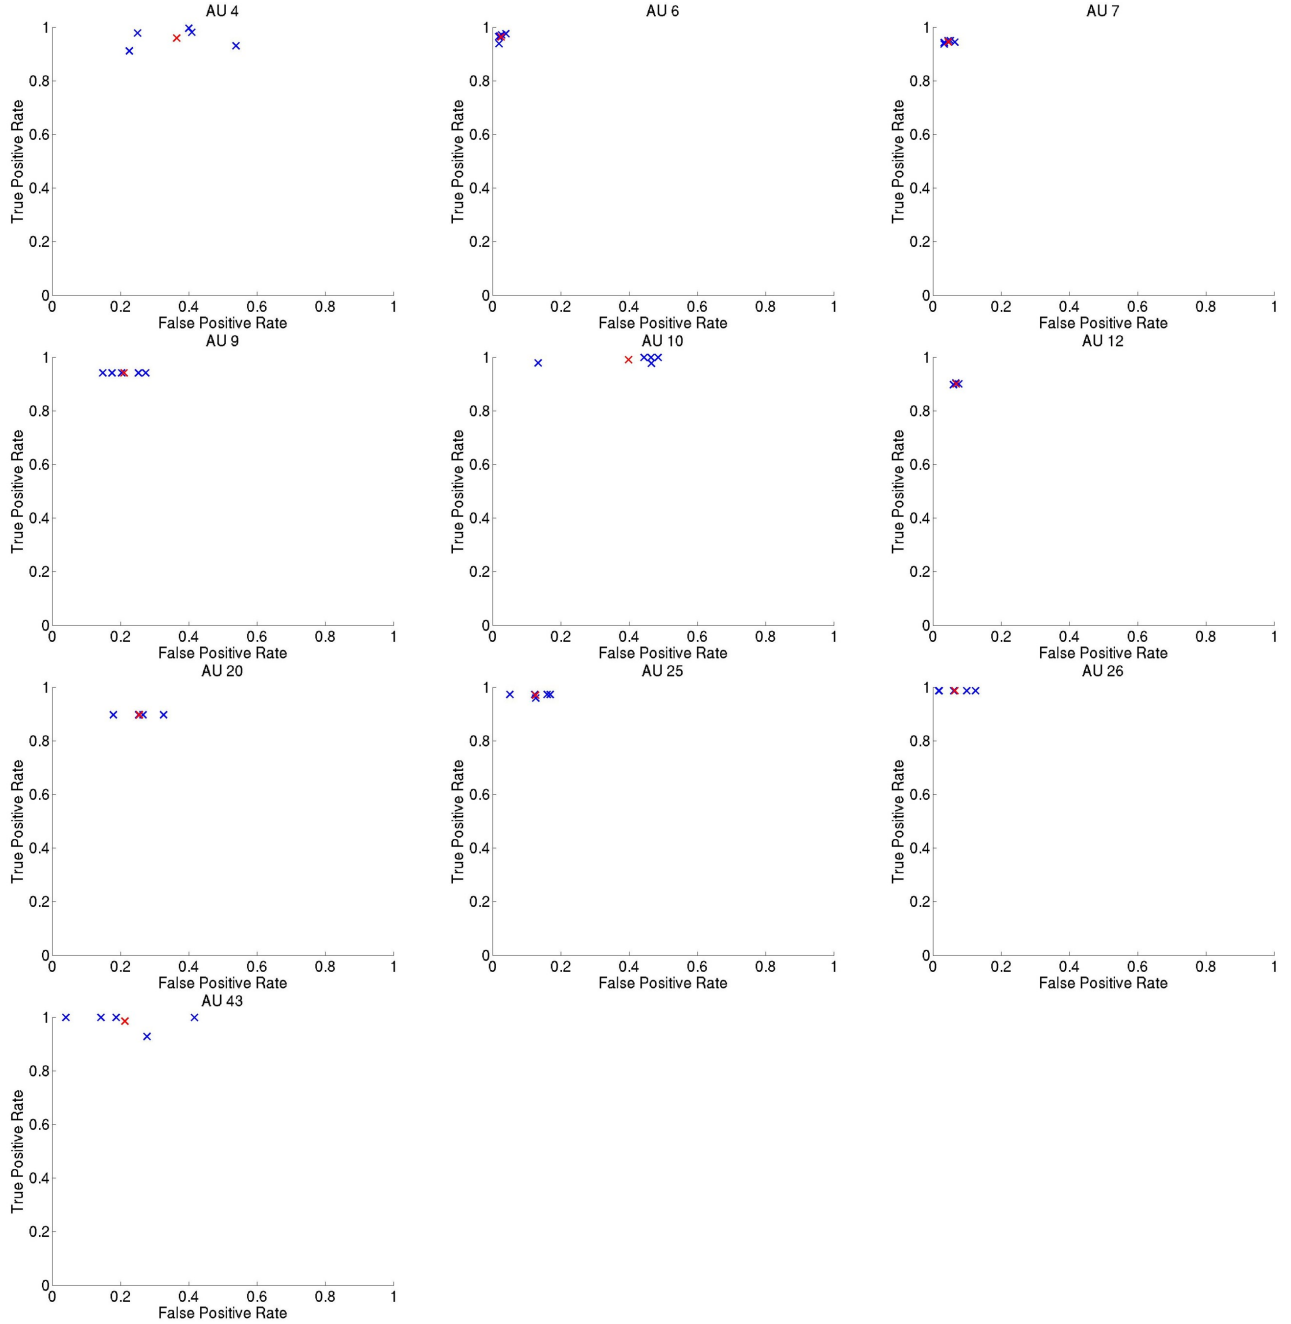

Figure S1: True positive rate against false positive rate of the proposed algorithm for each of the AUs automatically recognized in the images of the shoulder pain database. Shown in the figure are the five results of the five-fold cross-validation test (shown in blue) and the mean (shown in red).

tated AUs and AU intensities. The AUs we annotated were 1, 2, 4, 5, 6, 9, 12, 15, 17, 20, 25 and 26, since these were the well represented ones in the databases used for training the system. Note that we need a set of accurately annotated AUs and AU intensities to be included during training.

Figure S5a shows the percentages of images in our

database of facial expressions in the wild that were automatically annotated with AU  $i$ . For example, AU 1 was automatically annotated in over 200,000 images.

Importantly, we manually FACS-coded 10% of this database. That is, a total of 100,000 images were manually annotated with AUs by experienced coders in our lab-

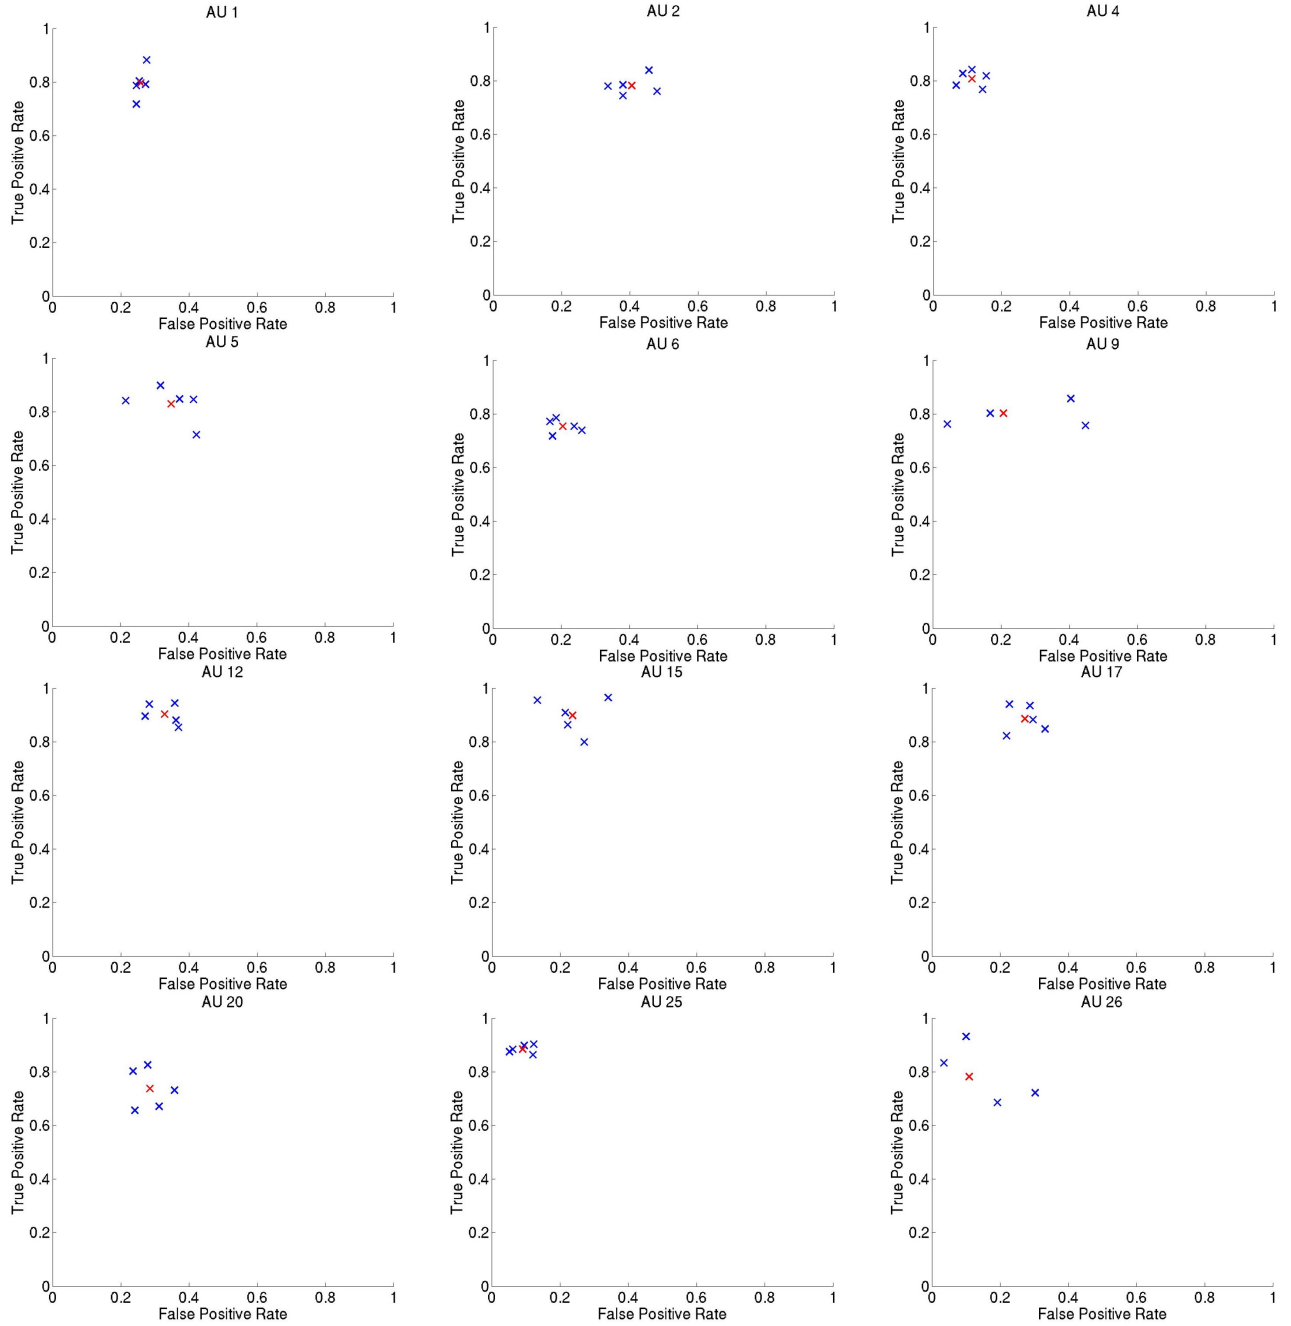

Figure S2: True positive rate against false positive rate of the proposed algorithm for each of the AUs automatically recognized in the images of the DISFA dataset.

| AU                | 4            | 6            | 7            | 9            | 10           | 12           | 20           | 25           | 26           | 43           |
|-------------------|--------------|--------------|--------------|--------------|--------------|--------------|--------------|--------------|--------------|--------------|
| This paper        | <b>82.45</b> | <b>93.48</b> | <b>88.57</b> | <b>92.56</b> | <b>86.15</b> | <b>98.54</b> | <b>91.13</b> | <b>81.46</b> | <b>87.19</b> | <b>95.47</b> |
| Lucey et al. [5]  | 53.7         | 86.2         | 70           | 79.8         | 75.4         | 85.6         | 66.8         | 73.3         | 52.3         | 90.9         |
| Zafar et al. [11] | 78.77        | <b>91.2</b>  |              | <b>92.1</b>  |              |              |              |              |              | <b>96.53</b> |

Table S1: Area under the curve for the results shown in Figure S3.

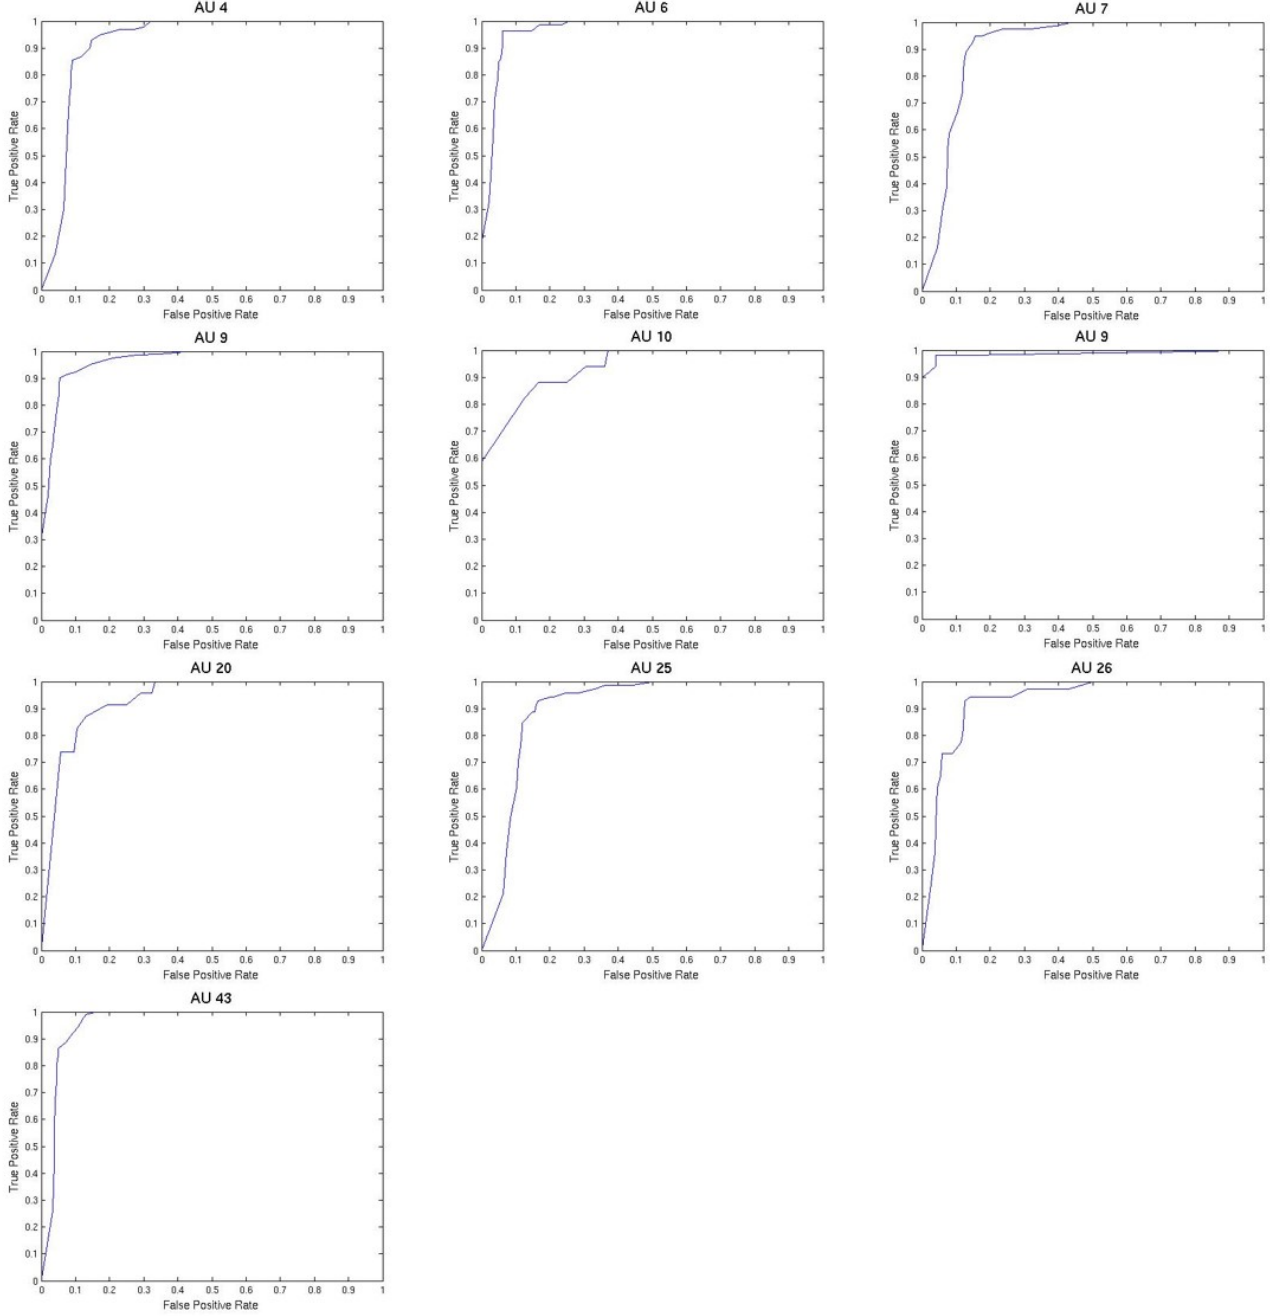

Figure S3: ROC curves for each AU on the shoulder pain database. ROC curves were computed by varying the value of the priors for AU  $i$  present and AU  $i$  not present.

oratory. This allowed us to estimate the AU detection accuracy of our algorithm, which was about 80%. Note this is extremely accurate given the heterogeneity of the images in the EmotioNet dataset. However, this number only considers correct true positive and true negatives, but does *not* include false negative. Additional work is needed to provide a full analysis of our proposed method on millions of

images.

Once an image had been annotated with AUs and AU intensities, we used Table 1 to determine if the face in the image expressed one of the 23 basic or compound emotion categories described in [2, 3]. Note that a facial expression needs not belong to one of these categories. Only when the unique pattern of AU activation described in Ta-

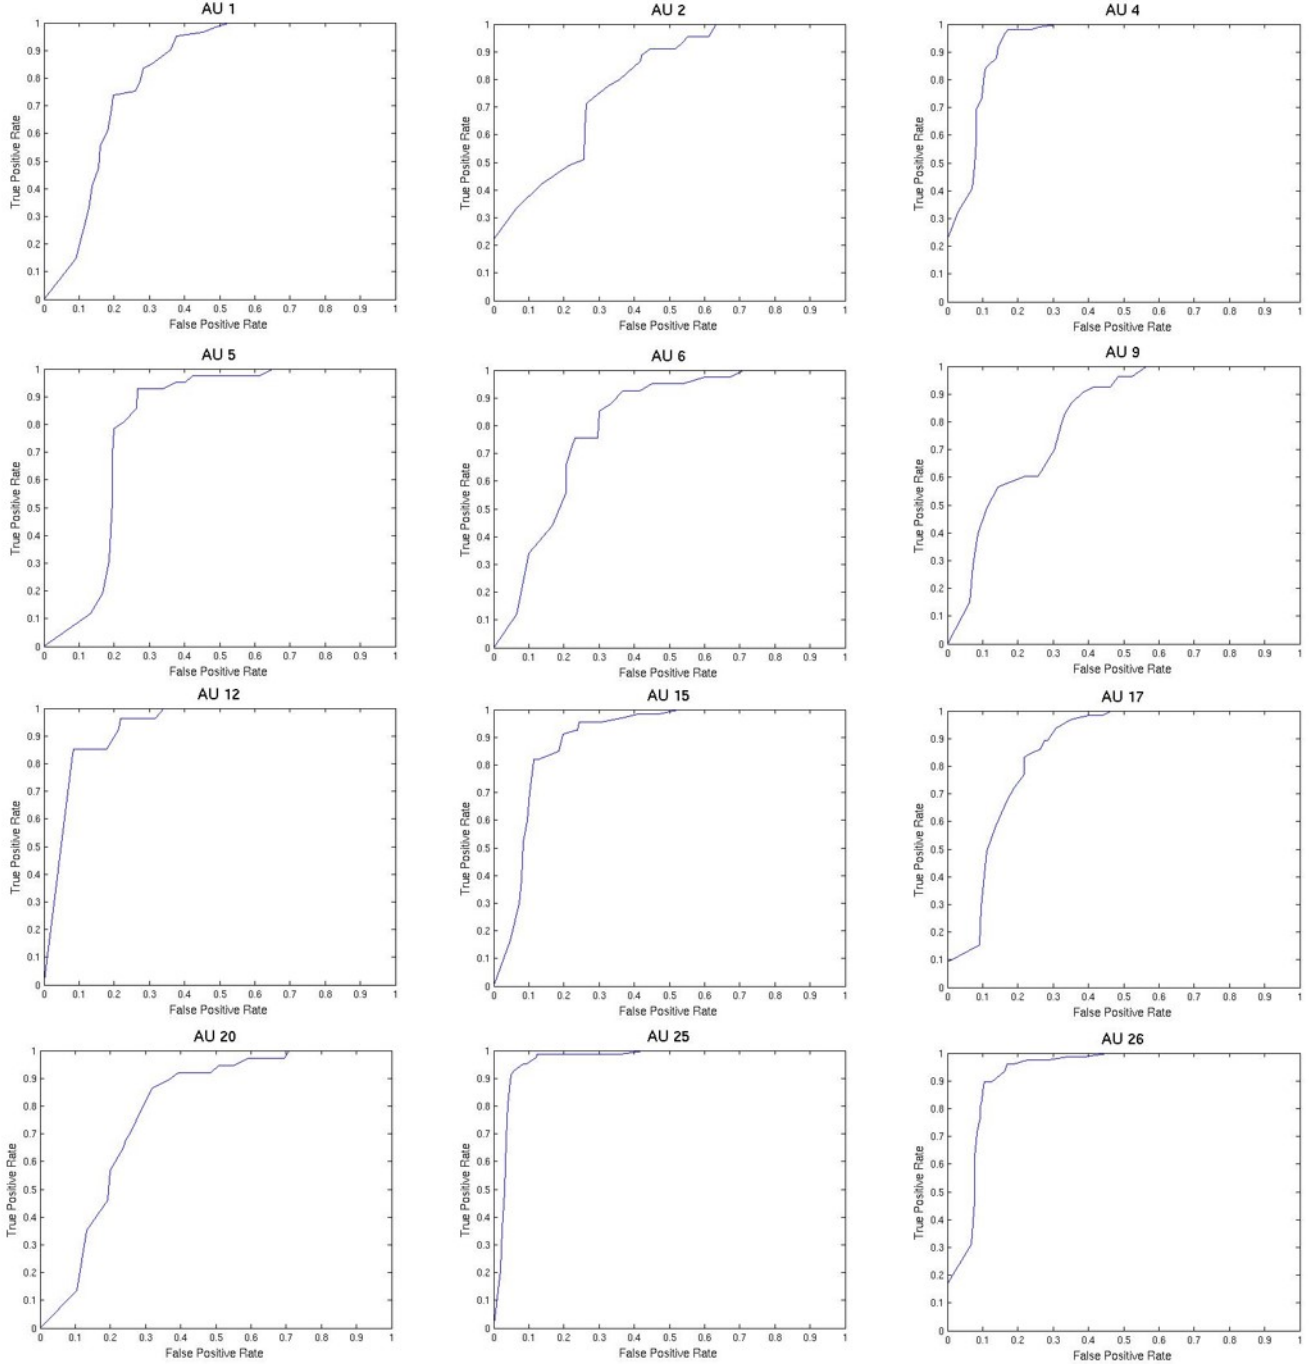

Figure S4: ROC curves for each AU on the DISFA database. ROC curves were computed by varying the value of the priors for AU  $i$  present and AU  $i$  not present.

ble 1 was present was the face classified as expressing one of these emotions. Figure S5b shows the percentage of images of each emotion category in our database. For example, over 78,000 images include a facial expression of anger and about 76,000 have an expression of sadly disgusted. Our algorithm has also been successfully used to detect the

”not face” in images in the wild [1]. The ”not face” is a grammatical marker of negation and a facial expression of negation and disapproval.

The above two sections have shown additional quantitative results and analyses of the approach and database of facial expressions of emotion in the wild defined in the main

paper. Figure S6 now shows qualitative examples of the images automatically annotated with AU 12 active (present).

### 3. Rank ordering AU classification

To retrieve images with AU  $i$  active, we rank-ordered images according to the posterior probability given by the logistic regression function in the face space of AU  $i$ . More formally, let  $\mathbf{z}^\varphi$  be the sample feature vector of image  $\mathbf{I}$  in the kernel space of AU  $i$ , then the posterior probability is given by,

$$\log \left( \frac{P(\text{AU } i \text{ active} | \mathbf{Z} = \mathbf{z}^\varphi)}{P(\text{AU } i \text{ inactive} | \mathbf{Z} = \mathbf{z}^\varphi)} \right) = \mathbf{b}_i + \mathbf{n}_i^T \mathbf{z}^\varphi, \quad (\text{S1})$$

where  $\mathbf{b}_i$  and  $\mathbf{n}_i$  are the bias and normal of the hyperplane defining the classifier of AU  $i$  in kernel space. It is easy to show that (S1) above is equivalent to,

$$P(\text{AU } i \text{ active} | \mathbf{Z} = \mathbf{z}^\varphi) = \frac{1}{1 + e^{-(\mathbf{b}_i + \mathbf{n}_i^T \mathbf{z}^\varphi)}}. \quad (\text{S2})$$

The parameters  $\mathbf{b}_i$  and  $\mathbf{n}_i$  are estimated with iterative re-weighted least squares on the training data  $\mathcal{D}_i$  and by optimizing the following function,

$$(\mathbf{b}^*, \mathbf{n}_i^*) = \arg \min_{\mathbf{b}, \mathbf{n}_i} \sum_{j=1}^{n_i + m_i} \{y_{ij}(\mathbf{b}_i + \mathbf{n}_i^T \mathbf{z}_i^\varphi) - \log(1 + e^{-(\mathbf{b}_i + \mathbf{n}_i^T \mathbf{z}_i^\varphi)})\}. \quad (\text{S3})$$

The images we previously shown in Figure S6 are rank-ordered by (S3) such that the images in the first row have a greater posterior than those in the second row and, in general, the images of a top row have a larger posterior than those in its bottom row. Images in the same row have a similar posterior.

### 4. Ordinal Regression Metrics

The evaluation of AU intensities is a bit trickier than that of AU active/inactive because these are defined by ordinal variables. Unfortunately, evaluation of ordinal variables is a difficult problem. One popular solution is to use the Mean Zero-one Error (MZE), given by  $n^{-1} \sum L(f(\mathbf{z}_i) \neq y_i)$ , where  $n$  is the number of samples,  $L(\cdot)$  is an indicator function,  $\mathbf{z}_i$  are the samples,  $y_i$  are the ordinal labels, and  $f(\cdot)$  is the function that estimates the ordinal variable  $y$ . Note that this metric does not take the ordinal nature of the labels  $y_i$  into account and thus misclassifying a sample  $\mathbf{z}_i$  with ordinal value  $k$  by any other value but  $k$  is considered equally bad. This is not applicable to our case because misclassifying AU intensity by one ordinal step is better than misclassifying it by two which, in turn, is better than misclassifying it by three and so on.

Two other popular methods for evaluating one's estimates of ordinal variables are the Mean Absolute Error (MAE) and the Mean Square Error (MSE). Here, a function  $g(\cdot)$  is employed to assign real values to the ordinal categories, e.g., AU intensity  $a = 1, b = 2, c = 3, d = 4$  and  $e = 5$ . The error is then measured as  $n^{-1} \sum |y_i - f(\mathbf{z}_i)|^b$ , where  $y_i$  and  $f(\cdot)$  are now real numbers, and  $b = 1$  for MAE and  $b = 2$  for MSE. This is a popular option and was the one chosen to analyze the results in the main paper (with  $b = 1$ ).

The main problem with the aforementioned approach is that it assumes that the distance between any two ordinal values is the same, i.e., the distance between AU intensity  $a$  and  $b$  is the same as the distance between  $c$  and  $d$ . This is of course not necessarily true.

While the distance between any pair of AU intensities is difficult to define generally, its definition can be readily obtained in most applications. For example, in some applications, misclassifying intensity  $a$  as  $c$  is twice as bad as misclassifying  $a$  as  $b$ , and misclassifying intensity  $a$  as  $e$  is twice as bad as misclassifying  $a$  as  $c$ . This corresponds to a linear function and thus MSE or MAE are the most appropriate measurements. However, when misclassifying intensity  $a$  as  $c$  is only a little worse than misclassifying  $a$  as  $b$ , MAE and MSE need to be modified. This can be easily done by defining

$$\frac{1}{n} \sum_{i=1}^n |M(y_i, f(\mathbf{z}_i))|^b, \quad (\text{S4})$$

where  $y_i$  and  $\mathbf{z}_i$  now take values from the ordinal set  $\{a, b, c, d, e\}$ ,  $M(\cdot, \cdot)$  is a  $5 \times 5$  matrix with each  $(p, q)$  entry specifying how bad our estimation of AU intensity is in our application. For example, we can define  $M(\cdot, \cdot)$  as

|   | a   | b   | c   | d   | e   |
|---|-----|-----|-----|-----|-----|
| a | 0   | 1   | 1.2 | 1.3 | 1.4 |
| b | 1   | 0   | 1   | 1.2 | 1.3 |
| c | 1.2 | 1   | 0   | 1   | 1.2 |
| d | 1.3 | 1.2 | 1   | 0   | 1   |
| e | 1.4 | 1.3 | 1.2 | 1   | 0   |

Using the above defined metric (and  $b = 1$ ) to calculate the AU intensity estimation errors of our derived algorithm across databases yields the following errors: .73 for AU 4, .62 for AU 6, .58 for AU 9, .46 for AU 12, .7 for AU 20, .43 for AU 25, and .49 for AU 26. These results would substitute those previously reported in Figure 5b and are based on the idea that misclassifying by one ordinal value is almost as bad as any other misclassification.

|    |                                                           |     |                                                                   |
|----|-----------------------------------------------------------|-----|-------------------------------------------------------------------|
| 1  | Feeling                                                   | 62  | Anxiousness, disquiet                                             |
| 2  | Affect                                                    | 63  | Insecurity                                                        |
| 3  | Emotion                                                   | 64  | Disquietude, edginess, inquietude, uneasiness                     |
| 4  | Conditioned emotional response                            | 65  | Care, concern, fear                                               |
| 5  | Anger, choler, ire                                        | 66  | Willies                                                           |
| 6  | Fury, madness, rage                                       | 67  | Sinking                                                           |
| 7  | Wrath                                                     | 68  | Misgiving, qualm, scruple                                         |
| 8  | Lividity                                                  | 69  | Jitteriness, jumpiness, nervousness, restiveness                  |
| 9  | Enragement, infuriation                                   | 70  | Angst                                                             |
| 10 | Offence, offense, umbrage                                 | 71  | Joy, joyfulness, joyousness                                       |
| 11 | Indignation, outrage                                      | 72  | Elation, lightness                                                |
| 12 | Dudgeon                                                   | 73  | Euphoria, euphory                                                 |
| 13 | Huffiness                                                 | 74  | Exultation, jubilation                                            |
| 14 | Dander, hackles                                           | 75  | Triumph                                                           |
| 15 | Irascibility, spleen                                      | 76  | Excitement, exhilaration                                          |
| 16 | Connption, fit, scene, tantrum                            | 77  | Bang, boot, charge, flush, kick, rush, thrill                     |
| 17 | Annoyance, chafe, vexation                                | 78  | Intoxication                                                      |
| 18 | Irritation, pique, temper                                 | 79  | Titillation                                                       |
| 19 | Frustration                                               | 80  | Exuberance                                                        |
| 20 | Aggravation, exasperation                                 | 81  | Love                                                              |
| 21 | Harassment, torment                                       | 82  | Adoration, worship                                                |
| 22 | Displeasure                                               | 83  | Agape                                                             |
| 23 | Fear, fearfulness, fright                                 | 84  | Crush, infatuation                                                |
| 24 | Alarm, consternation, dismay                              | 85  | Amorousness, enamoredness                                         |
| 25 | Creeps                                                    | 86  | Ardor, ardour                                                     |
| 26 | Chill, frisson, quiver, shiver, shudder, thrill, tingle   | 87  | Devotedness, devotion                                             |
| 27 | Horror                                                    | 88  | Benevolence                                                       |
| 28 | Hysteria                                                  | 89  | Beneficence                                                       |
| 29 | Affright, panic, terror                                   | 90  | Heartstrings                                                      |
| 30 | Swivet                                                    | 91  | Caring, lovingness                                                |
| 31 | Scare                                                     | 92  | Warmheartedness, warmth                                           |
| 32 | Apprehension, apprehensiveness, dread                     | 93  | Hate, hatred                                                      |
| 33 | Trepidation                                               | 94  | Loyalty                                                           |
| 34 | Boding, foreboding, premonition, presentiment             | 95  | Abhorrence, abomination, detestation, execration, loathing, odium |
| 35 | Shadow                                                    | 96  | Misanthropy                                                       |
| 36 | Presage                                                   | 97  | Misogamy                                                          |
| 37 | Suspense                                                  | 98  | Misogynism, misogyny                                              |
| 38 | Gloom, gloominess, somberness, somberness                 | 99  | Misology                                                          |
| 39 | Chill, pall                                               | 100 | Misoneism                                                         |
| 40 | Timidity, timidness, timorousness                         | 101 | Murderousness                                                     |
| 41 | Shyness                                                   | 102 | Despising                                                         |
| 42 | Diffidence, self-distrust, self-doubt                     | 103 | Enmity, hostility                                                 |
| 43 | Hesitance, hesitancy                                      | 104 | Animosity, animus                                                 |
| 44 | Unassertiveness                                           | 105 | Antagonism                                                        |
| 45 | Intimidation                                              | 106 | Aggression, aggressiveness                                        |
| 46 | Awe, fear, reverence, veneration                          | 107 | Belligerence, belligerency                                        |
| 47 | Anxiety                                                   | 108 | Warpath                                                           |
| 48 | Discomfiture, discomposure, disconcertion, disconcertment | 109 | Bitterness, gall, rancor, rancor, resentment                      |
| 49 | Trouble, worry                                            | 110 | Huffishness, sulkiness                                            |
| 50 | Grievance, grudge, score                                  | 111 | Comfort                                                           |
| 51 | Enviousness, envy                                         | 112 | Felicity, happiness                                               |
| 52 | Covetousness                                              | 113 | Beatification, beatitude, blessedness                             |
| 53 | Jealousy                                                  | 114 | Enlightenment, nirvana                                            |
| 54 | Malevolence, malignity                                    | 115 | Radiance                                                          |
| 55 | Maleficence                                               | 116 | State                                                             |
| 56 | Malice, maliciousness, spite, spitefulness, venom         | 117 | Unhappiness                                                       |
| 57 | Vengefulness, vindictiveness                              | 118 | Embitterment                                                      |
| 58 | Spirit                                                    | 119 | Sadness, sorrow, sorrowfulness                                    |
| 59 | Embarrassment                                             | 120 | Huffishness, sulkiness                                            |
| 60 | Ecstasy, exaltation, rapture, raptus, transport           | 121 | Bereavement, mourning                                             |
| 61 | Gratification, satisfaction                               | 122 | Poignance, poignancy                                              |

Table S2: List of the WordNet concepts used as keywords to search images of faces in a variety of web search engines.

|     |                                                                              |     |                                                                   |
|-----|------------------------------------------------------------------------------|-----|-------------------------------------------------------------------|
| 123 | Glow                                                                         | 184 | Sex                                                               |
| 124 | Faintness                                                                    | 185 | Pleasance, pleasure                                               |
| 125 | Soul, soulfulness                                                            | 186 | Afterglow                                                         |
| 126 | Passion                                                                      | 187 | Delectation, delight                                              |
| 127 | Infatuation                                                                  | 188 | Entrancement, ravishment                                          |
| 128 | Abandon, wildness                                                            | 189 | Amusement                                                         |
| 129 | Ardor, ardor, fervency, fervor, fervor, fire                                 | 190 | Schadenfreude                                                     |
| 130 | Zeal                                                                         | 191 | Enjoyment                                                         |
| 131 | Storminess                                                                   | 192 | Gusto, relish, zest, zestfulness                                  |
| 132 | Sentiment                                                                    | 193 | Pleasantness                                                      |
| 133 | Sentimentality                                                               | 194 | Comfort                                                           |
| 134 | Bathos, mawkishness                                                          | 195 | Consolation, solace, solacement                                   |
| 135 | Complex                                                                      | 196 | Alleviation, assuagement, relief                                  |
| 136 | Ambivalence, ambivalency                                                     | 197 | Algolagnia, algophilia                                            |
| 137 | Conflict                                                                     | 198 | Sadism                                                            |
| 138 | Apathy                                                                       | 199 | Sadomasochism                                                     |
| 139 | Emotionlessness, impassiveness, impassivity, indifference, phlegm, stolidity | 200 | Masochism                                                         |
| 140 | Languor, lassitude, listlessness                                             | 201 | Pain, painfulness                                                 |
| 141 | Desire                                                                       | 202 | Unpleasantness                                                    |
| 142 | Ambition, aspiration, dream                                                  | 203 | Hurt, suffering                                                   |
| 143 | Emulation                                                                    | 204 | Agony, torment, torture                                           |
| 144 | Nationalism                                                                  | 205 | Throes                                                            |
| 145 | Bloodlust                                                                    | 206 | Discomfort, irritation, soreness                                  |
| 146 | Temptation                                                                   | 207 | Distress, hurt, suffering                                         |
| 147 | Craving                                                                      | 208 | Anguish, torment, torture                                         |
| 148 | Appetence, appetency, appetite                                               | 209 | Self-torment, self-torture                                        |
| 149 | Stomach                                                                      | 210 | Tsoris                                                            |
| 150 | Addiction                                                                    | 211 | Wound                                                             |
| 151 | Want, wish, wishing                                                          | 212 | Pang, stab, twinge                                                |
| 152 | Velleity                                                                     | 213 | Liking                                                            |
| 153 | Hungriness, longing, yearning                                                | 214 | Leaning, propensity, tendency                                     |
| 154 | Hankering, yen                                                               | 215 | Fancy, fondness, partiality                                       |
| 155 | Pining                                                                       | 216 | Captivation, enchantment, enthrallment, fascination               |
| 156 | Lovesickness                                                                 | 217 | Penchant, predilection, preference, taste                         |
| 157 | Wistfulness                                                                  | 218 | Weakness                                                          |
| 158 | Nostalgia                                                                    | 219 | Mysophilia                                                        |
| 159 | Homesickness                                                                 | 220 | Inclination                                                       |
| 160 | Discontent, discontentment                                                   | 221 | Stomach                                                           |
| 161 | Disgruntlement                                                               | 222 | Undertow                                                          |
| 162 | Dysphoria                                                                    | 223 | Friendliness                                                      |
| 163 | Dissatisfaction                                                              | 224 | Amicability, amicableness                                         |
| 164 | Boredom, ennui, tedium                                                       | 225 | Goodwill                                                          |
| 165 | Blahs                                                                        | 226 | Brotherhood                                                       |
| 166 | Fatigue                                                                      | 227 | Approval                                                          |
| 167 | Displeasure                                                                  | 228 | Favor, favour                                                     |
| 168 | Disappointment, letdown                                                      | 229 | Approbation                                                       |
| 169 | Defeat, frustration                                                          | 230 | Admiration, esteem                                                |
| 170 | Concupiscence, eros                                                          | 231 | Anglophilia                                                       |
| 171 | Love                                                                         | 232 | Philhellenism                                                     |
| 172 | Aphrodisia                                                                   | 233 | Philogyny                                                         |
| 173 | Passion                                                                      | 234 | Dislike                                                           |
| 174 | Sensualism, sensuality, sensualness                                          | 235 | Disinclination                                                    |
| 175 | Amativeness, amorousness, eroticism, erotism, sexiness                       | 236 | Anglophobia                                                       |
| 176 | Carnality, lasciviousness, lubricity, prurience, pruriency                   | 237 | Unfriendliness                                                    |
| 177 | Fetish                                                                       | 238 | Alienation, disaffection, estrangement                            |
| 178 | Libido                                                                       | 239 | Isolation                                                         |
| 179 | Lecherousness, lust, lustfulness                                             | 240 | Antipathy, aversion, distaste                                     |
| 180 | Nymphomania                                                                  | 241 | Disapproval                                                       |
| 181 | Satyriasis                                                                   | 242 | Contempt, despite, disdain, scorn                                 |
| 182 | Itch, urge                                                                   | 243 | Disgust                                                           |
| 183 | Caprice, impulse, whim                                                       | 244 | Abhorrence, abomination, detestation, execration, loathing, odium |

Table S3: Continues from Table S2.



|     |                                                           |     |                                                               |
|-----|-----------------------------------------------------------|-----|---------------------------------------------------------------|
| 245 | Horror, repugnance, repulsion, revulsion                  | 306 | Sensation                                                     |
| 246 | Nausea                                                    | 307 | Tumult, turmoil                                               |
| 247 | Creepy-crawlies                                           | 308 | Calmness                                                      |
| 248 | Scunner                                                   | 309 | Placidity, placidness                                         |
| 249 | Technophobia                                              | 310 | Coolness, imperturbability                                    |
| 250 | Antagonism                                                | 311 | Dreaminess, languor                                           |
| 251 | Gratitude                                                 | 312 | Bravery, fearlessness                                         |
| 252 | Appreciativeness, gratefulness, thankfulness              | 313 | Security                                                      |
| 253 | Ingratitude, ungratefulness                               | 314 | Confidence                                                    |
| 254 | Unconcern                                                 | 315 | Quietness, quietude, tranquility, tranquillity                |
| 255 | Indifference                                              | 316 | Ataraxis, heartsease, peace, peacefulness, repose, serenity   |
| 256 | Aloofness, distance                                       | 317 | Easiness, relaxation                                          |
| 257 | Detachment, withdrawal                                    | 318 | Happiness                                                     |
| 258 | Coldheartedness, hardheartedness, heartlessness           | 319 | Bonheur                                                       |
| 259 | Cruelty, mercilessness, pitilessness, ruthlessness        | 320 | Gladfulness, gladness, gladness                               |
| 260 | Shame                                                     | 321 | Gaiety, merriment                                             |
| 261 | Conscience                                                | 322 | Glee, gleefulness, hilarity, mirth, mirthfulness              |
| 262 | Self-disgust, self-hatred                                 | 323 | Jocularity, jocundity                                         |
| 263 | Embarrassment                                             | 324 | Jolliness, jollity, joviality                                 |
| 264 | Self-consciousness, uncomfortableness, uneasiness         | 325 | Rejoicing                                                     |
| 265 | Shamefacedness, sheepishness                              | 326 | Belonging                                                     |
| 266 | Chagrin, humiliation, mortification                       | 327 | Comfortableness                                               |
| 267 | Confusion, discombobulation                               | 328 | Closeness, intimacy                                           |
| 268 | Abashment, bashfulness                                    | 329 | Togetherness                                                  |
| 269 | Discomfiture, discomposure, disconcertion, disconcertment | 330 | Blitheness, cheerfulness                                      |
| 270 | Pride, pridefulness                                       | 331 | Buoyancy, perkiness                                           |
| 271 | Dignity, self-regard, self-respect, self-worth            | 332 | Carefreeness, insouciance, lightheartedness, lightsomeness    |
| 272 | Self-esteem, self-pride                                   | 333 | Contentment                                                   |
| 273 | Ego, egotism, self-importance                             | 334 | Satisfaction                                                  |
| 274 | Conceit, self-love, vanity                                | 335 | Pride                                                         |
| 275 | Humbleness, humility                                      | 336 | Complacence, complacency, self-complacency, self-satisfaction |
| 276 | Meekness, submission                                      | 337 | Smugness                                                      |
| 277 | Self-depreciation                                         | 338 | Fulfillment, fulfilment                                       |
| 278 | Amazement, astonishment                                   | 339 | Gloat, gloating                                               |
| 279 | Admiration, wonder, wonderment                            | 340 | Sadness, unhappiness                                          |
| 280 | Awe                                                       | 341 | Dolefulness                                                   |
| 281 | Surprise                                                  | 342 | Heaviness                                                     |
| 282 | Stupefaction                                              | 243 | Melancholy                                                    |
| 283 | Daze, shock, stupor                                       | 344 | Gloom, gloominess, somberness, somberness                     |
| 284 | Devastation                                               | 345 | Heavyheartedness                                              |
| 285 | Expectation                                               | 346 | Brooding, pensiveness                                         |
| 286 | Anticipation, expectancy                                  | 247 | Weltschmerz, world-weariness                                  |
| 287 | Suspense                                                  | 248 | Misery                                                        |
| 288 | Fever                                                     | 349 | Desolation, forlornness, loneliness                           |
| 289 | Hope                                                      | 350 | Tearfulness, weepiness                                        |
| 290 | Levity                                                    | 351 | Sorrow                                                        |
| 291 | Gaiety, playfulness                                       | 352 | Brokenheartedness, grief, heartache, heartbreak               |
| 292 | Gravity, solemnity                                        | 353 | Dolor, dolour                                                 |
| 293 | Earnestness, seriousness, sincerity                       | 354 | Mournfulness, ruthfulness, sorrowfulness                      |
| 294 | Sensitiveness, sensitivity                                | 355 | Woe, woefulness                                               |
| 295 | Sensibility                                               | 356 | Plaintiveness                                                 |
| 296 | Insight, perceptiveness, perceptivity                     | 357 | Self-pity                                                     |
| 297 | Sensuousness                                              | 358 | Regret, rue, ruefulness, sorrow                               |
| 298 | Feelings                                                  | 359 | Attrition, contriteness, contrition                           |
| 299 | Agitation                                                 | 360 | Compunction, remorse, self-reproach                           |
| 300 | Unrest                                                    | 361 | Guilt                                                         |
| 301 | Fidget, fidgetiness, restlessness                         | 362 | Penance, penitence, repentance                                |
| 302 | Impatience                                                | 363 | Cheerlessness, uncheerfulness                                 |
| 303 | Stewing                                                   | 364 | Joylessness                                                   |
| 304 | Stir                                                      | 365 | Depression                                                    |
| 305 | Electricity                                               | 366 | Demoralization                                                |

Table S4: Continues from Tables S2-S3.

|     |                                                                                             |     |                                                                                    |
|-----|---------------------------------------------------------------------------------------------|-----|------------------------------------------------------------------------------------|
| 367 | Helplessness                                                                                | 395 | Jolliness, jollity, joviality                                                      |
| 368 | Despondence, despondency, disconsolateness, heartsickness                                   | 396 | Distemper                                                                          |
| 369 | Oppression, oppressiveness                                                                  | 397 | Moodiness                                                                          |
| 370 | Weight                                                                                      | 398 | Glumness, moroseness, sullenness                                                   |
| 371 | Dysphoria                                                                                   | 399 | Testiness, tetchiness, touchiness                                                  |
| 372 | Dejectedness, dispiritedness, downheartedness, low-spiritedness, lowness                    | 400 | Technophilia                                                                       |
| 373 | Hope                                                                                        | 401 | Pet                                                                                |
| 374 | Hopefulness                                                                                 | 402 | Sympathy                                                                           |
| 375 | Encouragement                                                                               | 403 | Concern                                                                            |
| 376 | Optimis                                                                                     | 404 | Solicitousness, solicitude                                                         |
| 377 | Sanguineness, sanguinity                                                                    | 405 | Softheartedness, tenderness                                                        |
| 378 | Despair                                                                                     | 406 | Kind-heartedness, kindheartedness                                                  |
| 379 | Hopelessness                                                                                | 407 | Mellowness                                                                         |
| 380 | Resignation, surrender                                                                      | 408 | Exuberance                                                                         |
| 381 | Defeatism                                                                                   | 409 | Compassion, compassionateness                                                      |
| 382 | Discouragement, disheartenment, dismay                                                      | 410 | Heartstrings                                                                       |
| 383 | Intimidation                                                                                | 411 | Tenderheartedness, tenderness                                                      |
| 384 | Pessimism                                                                                   | 412 | Ardor, ardour, elan, zeal                                                          |
| 385 | Cynicism                                                                                    | 413 | Mercifulness, mercy                                                                |
| 386 | Affection, affectionateness, fondness, heart, philia, tenderness<br>warmheartedness, warmth | 414 | Choler, crossness, fretfulness, fussiness, irritability,<br>peevishness, petulance |
| 387 | Attachment                                                                                  | 415 | Forgiveness                                                                        |
| 389 | Protectiveness                                                                              | 416 | Commiseration, pathos, pity, ruth                                                  |
| 390 | Regard, respect                                                                             | 417 | Compatibility                                                                      |
| 391 | Humor, mood, temper                                                                         | 418 | Empathy                                                                            |
| 392 | Peeve                                                                                       | 419 | Enthusiasm                                                                         |
| 393 | Sulk, sulkiness                                                                             | 420 | Gusto, relish, zest, zestfulness                                                   |
| 394 | Amiability                                                                                  | 421 | Avidity, avidness, eagerness, keenness                                             |

Table S5: Continues from Tables S2-S4.

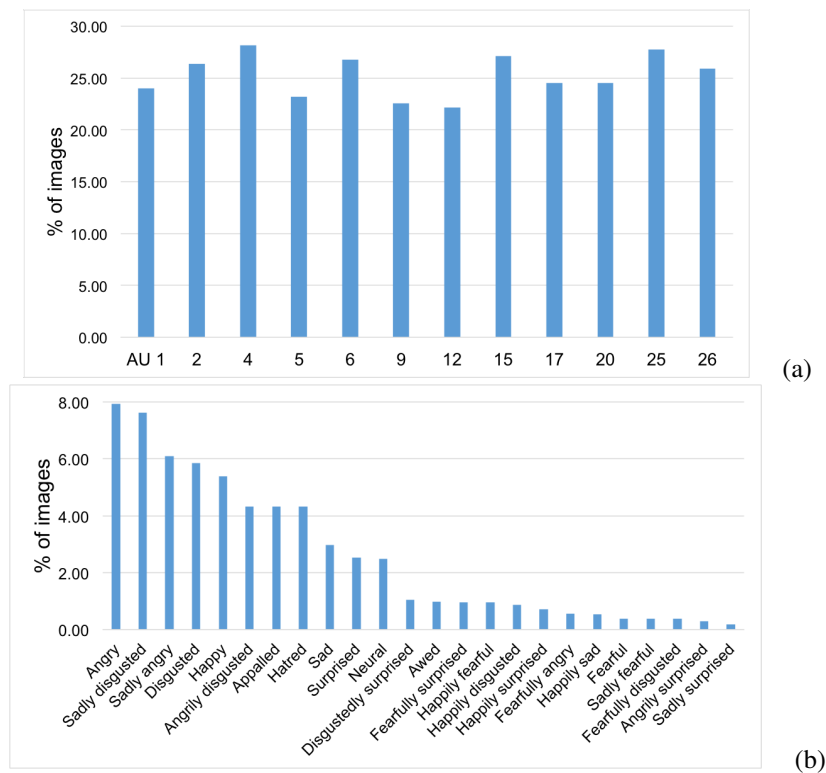

Figure S5: (a) Percentage of images ( $y$ -axis) automatically annotated with AU  $i$  ( $x$ -axis). (b) Percentage of images ( $y$ -axis) automatically annotated with one of the 23 basic or compound emotion categories ( $x$ -axis) listed in Table 1.

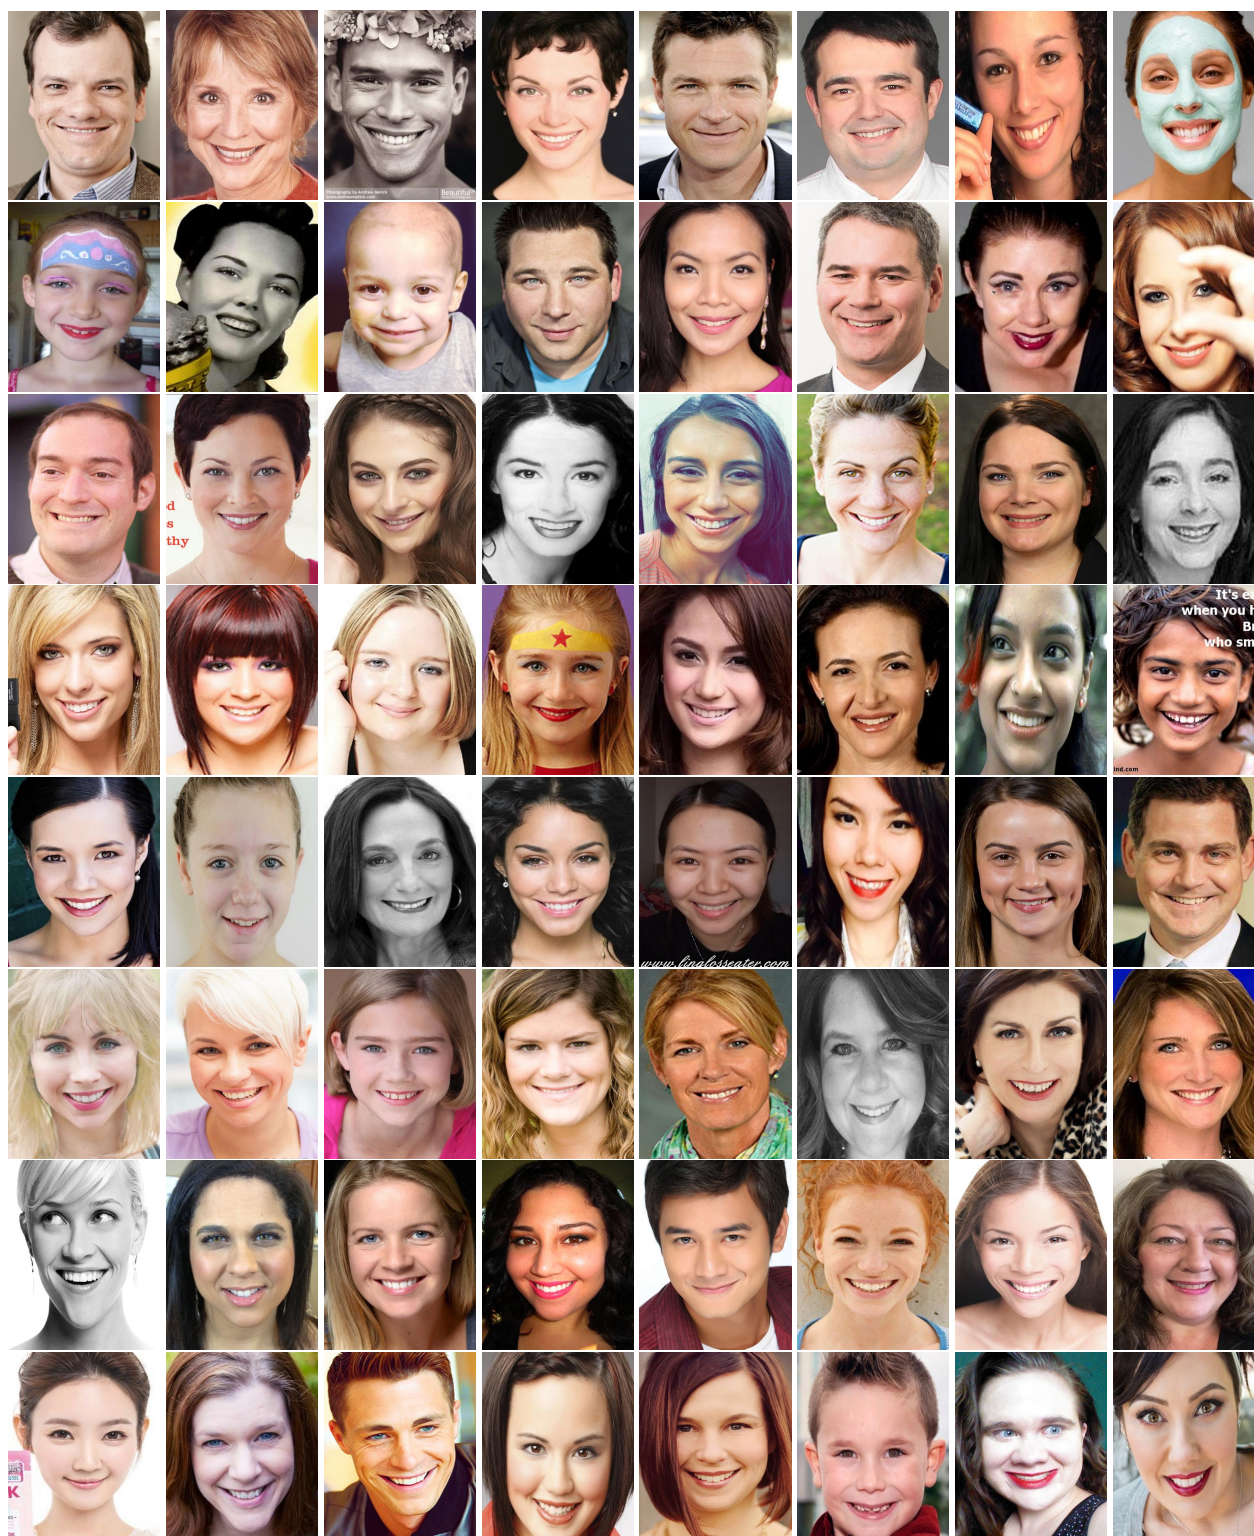

Figure S6: Sample images with AU 12 automatically annotated by our algorithm. The images are ranked according to the probability of AU 12 being active in the image.



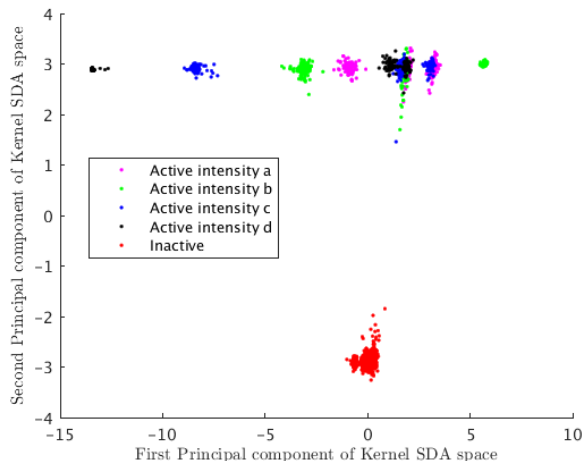

Figure S7: The first two KSDA components of the face space of an AU. Different colors correspond to distinct intensities of the AU. Note how some intensities are divided into subclasses, whereas others are not.

## 5. Subclass-based Representation of AUs

A key component of our algorithm is to assign the images with AU  $i$  active to distinct subclasses as a function of their intensity of activation. That is, images that show AU  $i$  active at intensity  $a$  are assigned to a subclass of class  $i$ , images showing AU  $i$  active at intensity  $b$  are assigned to a second subclass of class  $i$ , images showing AU  $i$  active at intensity  $c$  are assigned to a third subclass of class  $i$ , and images showing AU  $i$  active at intensity  $d$  are assigned to a fourth subclass of class  $i$ . This innovative approach is what allows us to simultaneously identify AUs and their intensities quickly and accurately in images.

This approach is related to the work of Subclass Discriminant Analysis (SDA) [12], which is a mathematical formulation specifically derived to identify the optimal number of subclasses to maximize spreadability of samples in different classes even when these are not defined by a Normal distribution. This is achieved by minimizing a criterion defined in [6], which guarantees Bayes optimality in this classification process under mild conditions.

The approach derived in the present paper is different in that we specify the initial subclass division, rather than using the Bayes criterion defined in [6]. Specifically, we derive a Kernel (SDA-inspired) algorithm to learn to simultaneously identify AUs and their intensities in images. This is done by first dividing the training data of each AU into five sets – one for each of the four intensities,  $\mathcal{D}_i(a)$  to  $\mathcal{D}_i(d)$ , and another set to include the images that do not have that AU active  $\mathcal{D}_i(\text{not active}) = \mathcal{D}_i - \cup_{j=a,b,c,d} \mathcal{D}_i(j)$ . Thus, the initial number of subclasses for class AU  $i$  active is 4, i.e.,  $h_{i1} = 4$ , and, the initial number of subclasses for AU  $i$

not active (i.e., not present) in the images is 1, i.e.,  $h_{i2} = 1$ . This was illustrated in Figure 3 in the main paper. A 2D plot, for one of the AUs, with real data is now shown in Figure S7. Also, the sample images in each of these five sets are sorted using the nearest-neighbor algorithm of [12].

Next, we use the criterion derived in the main paper,  $Q_i(\varphi_i, h_{i1}, h_{i2})$ , to further optimize the number of classes and the parameters of the kernel mapping function. This criterion maximizes spherical-homoscedasticity in the RBF kernel space, which is known to minimize the Bayes classification error [4]. Note that, in the paper, we used the RBF kernel, but other options are possible, with each one yielding a different optimization function  $Q(\cdot)$ .

## 6. Extended Discussion

The ability to automatically annotate facial action units in the wild in real time is likely to revolutionize research in the study of non-verbal communication and emotion theory. To date, most studies have focused on the analysis of data collected in the laboratory, even when this data corresponds to spontaneous facial expressions. Extending these studies to facial expressions in the wild is a necessary step.

The algorithm described in the present work achieves this goal, allowing researchers to analyze their data quickly and reliably. As a plus, our system is consistent with what is known about the visual perception of facial expressions of emotion by humans [3]. In fact, a recent result from our laboratory has identified a small region of interest in the human brain dedicated to the visual interpretation of facial actions [9]. The computer vision system defined in this paper could thus also help us advance our understanding of human perception.

## References

- [1] C. F. Benitez-Quiroz, R. B. Wilbur, and A. M. Martinez. The not face: A grammaticalization of facial expressions of emotion. *Cognition*, 150:77–84, 2016. 5
- [2] S. Du and A. M. Martinez. Compound facial expressions of emotion: from basic research to clinical applications. *Dialogues in clinical neuroscience*, 17(4):443, 2015. 4
- [3] S. Du, Y. Tao, and A. M. Martinez. Compound facial expressions of emotion. *Proceedings of the National Academy of Sciences*, 111(15):E1454–E1462, 2014. 4, 12
- [4] O. C. Hamsici and A. M. Martinez. Spherical-homoscedastic distributions: The equivalency of spherical and normal distributions in classification. *Journal of Machine Learning Research*, 8(1583-1623):1–3, 2007. 12
- [5] P. Lucey, J. F. Cohn, I. Matthews, S. Lucey, S. Sridharan, J. Howlett, and K. M. Prkachin. Automatically detecting pain in video through facial action units. *IEEE Transactions on Systems, Man, and Cybernetics, Part B: Cybernetics*, 41(3):664–674, 2011. 1, 3
- [6] A. M. Martinez and M. Zhu. Where are linear feature extraction methods applicable? *IEEE Transactions on Pat-*

*tern Analysis and Machine Intelligence*, 27(12):1934–1944, 2005. [12](#)

- [7] D. McDuff, R. Kaliouby, T. Senechal, M. Amr, J. Cohn, and R. Picard. Affectiva-mit facial expression dataset (am-fed): Naturalistic and spontaneous facial expressions collected. In *Proceedings of the IEEE Conference on Computer Vision and Pattern Recognition, Workshops*, pages 881–888, 2013. [1](#)
- [8] G. A. Miller. Wordnet: a lexical database for english. *Communications of the ACM*, 38(11):39–41, 1995. [1](#)
- [9] R. Srinivasan, J. D. Golomb, and A. M. Martine. A neural basis of facial action recognition in humans. *The Journal of Neuroscience*, 2016. [12](#)
- [10] P. Viola and M. J. Jones. Robust real-time face detection. *International journal of computer vision*, 57(2):137–154, 2004. [1](#)
- [11] Z. Zafar and N. A. Khan. Pain intensity evaluation through facial action units. In *Pattern Recognition (ICPR), 22nd International Conference on*, pages 4696–4701. IEEE, 2014. [1](#), [3](#)
- [12] M. Zhu and A. M. Martinez. Subclass discriminant analysis. *IEEE Transactions on Pattern Analysis and Machine Intelligence*, 28(8):1274–1286, 2006. [12](#)
